# Supplementary material
Source: Springer Nature journal article supplement (https://www.springermedizin.de/resource/supplementary/12943_2012_1134_MOESM11_ESM.pdf/9552572)

a

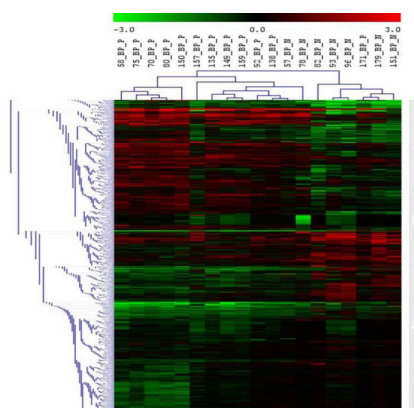

b

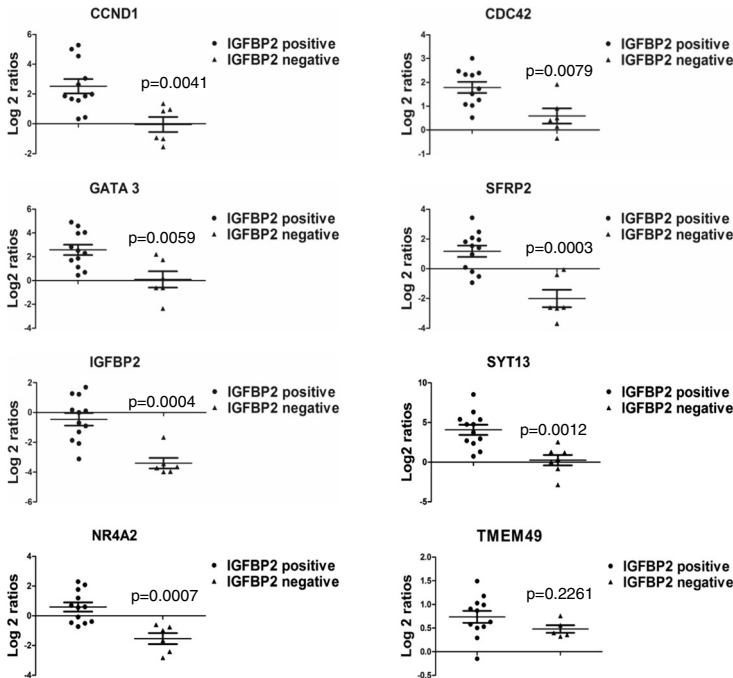

Supplement: MOESM11 [file 9552572]
